# Supplementary material
Source: publisher figshare collection journal article supplement (https://acs.figshare.com/ndownloader/files/24717529)
Supplement: Supplementary file 1 [file 24717529]

Compound_ID	SMILES	IC50 ¡À SE (micromole) in FP assay
9	O=S(N(CC(O)=O)C1=C(C)C=CC=C1)(C2=C(C)C=C(C)C=C2C)=O	450 ¡À10
10a	O=S(N(CC(O)=O)C1=C(C)C=CC(NC2=CC(OC)=CC=C2)=C1)(C3=C(C)C=C(C)C=C3C)=O	102.4¡À4.49
10b	O=S(N(CC(O)=O)C1=CC(C)=CC(NC2=CC(OC)=CC=C2)=C1)(C3=C(C)C=C(C)C=C3C)=O	93.36¡À2.87
10c	O=S(N(CC(O)=O)C1=CC=C(C)C(NC2=CC(OC)=CC=C2)=C1)(C3=C(C)C=C(C)C=C3C)=O	95.64¡À2.49
10d	O=S(N(CC(O)=O)C1=CC=CC(NC2=CC(OC)=CC=C2)=C1C)(C3=C(C)C=C(C)C=C3C)=O	30.06¡À1.21
10e	O=S(N(CC(O)=O)C1=CC=CC(NC2=CC(OC)=CC=C2)=C1)(C3=C(C)C=C(C)C=C3C)=O	101.7¡À5.82
10f	O=S(N(CC(O)=O)C1=CC=CC(NC2=CC(OC)=CC=C2)=C1C(F)(F)F)(C3=C(C)C=C(C)C=C3C)=O	>500
10g	O=S(N(CC(O)=O)C1=CC=CC(NC2=CC(OC)=CC=C2)=C1F)(C3=C(C)C=C(C)C=C3C)=O	80.06¡À3.83
10h	O=S(N(CC(O)=O)C1=CC=CC(NC2=CC(OC)=CC=C2)=C1OC)(C3=C(C)C=C(C)C=C3C)=O	55.39¡À3.12
10i	O=S(N(CC(O)=O)C1=CC=C(NC2=CC=CC(OC)=C2)C=C1)(C3=C(C)C=C(C)C=C3C)=O	>500
11a	O=S(N(CC(O)=O)C1=CC=CC2=C1CCN2C3=CC(OC)=CC=C3)(C4=C(C)C=C(C)C=C4C)=O	14.44¡À0.32
11b	COC1=CC(N2C3=CC=CC(N(S(C4=CC=C([N+]([O-])=O)C=C4)(=O)=O)CC(O)=O)=C3CC2)=CC=C1	> 100
11c	COC1=CC(N2C3=CC=CC(N(S(C4=CC=C(OC)C=C4)(=O)=O)CC(O)=O)=C3CC2)=CC=C1	>100
11d	COC1=CC(N2C3=CC=CC(N(S(C4=CC=C(NC(C)=O)C=C4)(=O)=O)CC(O)=O)=C3CC2)=CC=C1	>100
11e	COC1=CC(N2C3=CC=CC(N(S(C4=CC=C(C)C=C4)(=O)=O)CC(O)=O)=C3CC2)=CC=C1	>100
11f	COC1=CC(N2C3=CC=CC(N(S(C4=CC=C(F)C=C4)(=O)=O)CC(O)=O)=C3CC2)=CC=C1	>100
12	O=S(N(CC(O)=O)C1=CC=CC2=C1C=CN2C3=CC(OC)=CC=C3)(C4=C(C)C=C(C)C=C4C)=O	>100
13	O=S(N(CC(O)=O)C1=CC=CC2=C1CCCN2C3=CC(OC)=CC=C3)(C4=C(C)C=C(C)C=C4C)=O	43.15¡À0.92
14a	O=S(N(CC(O)=O)C1=CC=CC2=C1CCN2C(C3=CC(OC)=CC=C3)=O)(C4=C(C)C=C(C)C=C4C)=O	>100
14b	O=S(N(CC(O)=O)C1=CC=CC2=C1CCN2S(C3=CC(OC)=CC=C3)(=O)=O)(C4=C(C)C=C(C)C=C4C)=O	15.41¡À0.41
14c	O=S(N(CC(O)=O)C1=CC=CC2=C1CCN2CC3=CC(OC)=CC=C3)(C4=C(C)C=C(C)C=C4C)=O	16.45¡À0.26
14d	O=S(N(CC(O)=O)C1=CC=CC2=C1CCN2CC3=CC=C(OC)C=C3)(C4=C(C)C=C(C)C=C4C)=O	98.03¡À1.49
14e	O=S(N(CC(O)=O)C1=CC=CC2=C1CCN2CC3=CC=C(C)C=C3)(C4=C(C)C=C(C)C=C4C)=O	>100
14f	O=S(N(CC(O)=O)C1=CC=CC2=C1CCN2CC3=CC=C(C(F)(F)F)C=C3)(C4=C(C)C=C(C)C=C4C)=O	>100
14g	O=S(N(CC(O)=O)C1=CC=CC2=C1CCN2CC3=CC=C(Br)C=C3)(C4=C(C)C=C(C)C=C4C)=O	>100
14h	O=S(N(CC(O)=O)C1=CC=CC2=C1CCN2CC3=CC=C(Cl)C=C3)(C4=C(C)C=C(C)C=C4C)=O	>100
14i	O=S(N(CC(O)=O)C1=CC=CC2=C1CCN2CC3=C(OC)C=CC=C3)(C4=C(C)C=C(C)C=C4C)=O	>100
14j	O=S(N(CC(O)=O)C1=CC=CC2=C1CCN2CC3=CC=CC=C3)(C4=C(C)C=C(C)C=C4C)=O	42.03¡À1.03
14k	O=S(N(CC(O)=O)C1=CC=CC2=C1CCN2CC3=CC(C)=CC=C3)(C4=C(C)C=C(C)C=C4C)=O	>100
14l	O=S(N(CC(O)=O)C1=CC=CC2=C1CCN2CC3=CC(C(F)(F)F)=CC=C3)(C4=C(C)C=C(C)C=C4C)=O	>100
14m	O=S(N(CC(O)=O)C1=CC=CC2=C1CCN2CC3=CC(Br)=CC=C3)(C4=C(C)C=C(C)C=C4C)=O	>100
14n	O=S(N(CC(O)=O)C1=CC=CC2=C1CCN2CC3=CC(Cl)=CC=C3)(C4=C(C)C=C(C)C=C4C)=O	>100
14o	O=S(N(CC(O)=O)C1=CC=CC2=C1CCN2CC3=CC(C#N)=CC=C3)(C4=C(C)C=C(C)C=C4C)=O	24.81¡À0.86
14p	O=S(N(CC(O)=O)C1=CC=CC2=C1CCN2CC3=CC(C4=CC=CC=C4)=CC=C3)(C5=C(C)C=C(C)C=C5C)=O	>100
14q	O=S(N(CC(O)=O)C1=CC=CC2=C1CCN2CC3=CC(OCC)=CC=C3)(C4=C(C)C=C(C)C=C4C)=O	>100
14r	O=S(N(CC(O)=O)C1=CC=CC2=C1CCN2CC3=CC(OC(C)C)=CC=C3)(C4=C(C)C=C(C)C=C4C)=O	>100
14s	O=S(N(CC(O)=O)C1=CC=CC2=C1CCN2CC3=CC([N+]([O-])=O)=CC=C3)(C4=C(C)C=C(C)C=C4C)=O	27.27¡À0.84
14t	O=S(N(CC(O)=O)C1=CC=CC2=C1CCN2CC3=CC(C)=CC(C)=C3)(C4=C(C)C=C(C)C=C4C)=O	22.21¡À0.97
14u	O=S(N(CC(O)=O)C1=CC=CC2=C1CCN2CC3=C(C)C(C)=CC=C3)(C4=C(C)C=C(C)C=C4C)=O	98.24¡À2.36
14v	O=S(N(CC(O)=O)C1=CC=CC2=C1CCN2CC3=CC(OC)=CC(OC)=C3)(C4=C(C)C=C(C)C=C4C)=O	>100
14w	O=S(N(CC(O)=O)C1=CC=CC2=C1CCN2CC3=CC(OC)=CC(F)=C3)(C4=C(C)C=C(C)C=C4C)=O	>100
14x	O=S(N(CC(O)=O)C1=CC=CC2=C1CCN2CC3=CC(OC)=C(OC)C=C3)(C4=C(C)C=C(C)C=C4C)=O	>100
14y	O=S(N(CC(O)=O)C1=CC=CC2=C1CCN2CC3=CC(OC)=CC(Br)=C3)(C4=C(C)C=C(C)C=C4C)=O	>100
14z	O=S(N(CC(O)=O)C1=CC=CC2=C1CCN2CC3=CC(OC)=CC(C)=C3)(C4=C(C)C=C(C)C=C4C)=O	>100
15	O=S(N(CC(O)=O)C1=CC=CC2=C1CCN2C(C3=CC(OC)=CC=C3)C(O)=O)(C4=C(C)C=C(C)C=C4C)=O	2.37¡À0.06
16a	O=S(N(CC(O)=O)C1=CC=CC2=C1CCN2C(C(NS(C3=CC=CC=C3)(=O)=O)=O)C4=CC(OC)=CC=C4)(C5=C(C)C=C(C)C=C5C)=O	1.82¡À0.09
16b	O=S(N(CC(O)=O)C1=CC=CC2=C1CCN2C(C(NS(C)(=O)=O)=O)C3=CC(OC)=CC=C3)(C4=C(C)C=C(C)C=C4C)=O	5.72¡À0.28
16c	O=S(N(CC(O)=O)C1=CC=CC2=C1CCN2C(C(NS(=O)(C(F)(F)F)=O)=O)C3=CC(OC)=CC=C3)(C4=C(C)C=C(C)C=C4C)=O	4.89¡À0.24
16d	O=S(N(CC(O)=O)C1=CC=CC2=C1CCN2C(C(NS(C3=CC=CN=C3)(=O)=O)=O)C4=CC(OC)=CC=C4)(C5=C(C)C=C(C)C=C5C)=O	10.47¡À0.45
16e	O=S(N(CC(O)=O)C1=CC=CC2=C1CCN2C(C(NS(C3=CC=CS3)(=O)=O)=O)C4=CC(OC)=CC=C4)(C5=C(C)C=C(C)C=C5C)=O	5.17¡À0.15
16f	O=S(N(CC(O)=O)C1=CC=CC2=C1CCN2C(C(NS(C3=CC=C(OC)C=C3)(=O)=O)=O)C4=CC(OC)=CC=C4)(C5=C(C)C=C(C)C=C5C)=O	3.39¡À0.12
16g	O=S(N(CC(O)=O)C1=CC=CC2=C1CCN2C(C(NS(C3=CC=C(C)C=C3)(=O)=O)=O)C4=CC(OC)=CC=C4)(C5=C(C)C=C(C)C=C5C)=O	1.39¡À0.11
16h	O=S(N(CC(O)=O)C1=CC=CC2=C1CCN2C(C(NS(C3=CC=C(F)C=C3)(=O)=O)=O)C4=CC(OC)=CC=C4)(C5=C(C)C=C(C)C=C5C)=O	2.86¡À0.21
16i	O=S(N(CC(O)=O)C1=CC=CC2=C1CCN2C(C(NS(C3=CC=C(Cl)C=C3)(=O)=O)=O)C4=CC(OC)=CC=C4)(C5=C(C)C=C(C)C=C5C)=O	2.92¡À0.16
16j	O=S(N(CC(O)=O)C1=CC=CC2=C1CCN2C(C(NS(C3=CC=C(Br)C=C3)(=O)=O)=O)C4=CC(OC)=CC=C4)(C5=C(C)C=C(C)C=C5C)=O	2.95¡À0.24
16k	O=S(N(CC(O)=O)C1=CC=CC2=C1CCN2C(C(NS(C3=CC=C(C(F)(F)F)C=C3)(=O)=O)=O)C4=CC(OC)=CC=C4)(C5=C(C)C=C(C)C=C5C)=O	44.55¡À2.35
16l	O=S(N(CC(O)=O)C1=CC=CC2=C1CCN2C(C(NS(C3=CC(C)=CC=C3)(=O)=O)=O)C4=CC(OC)=CC=C4)(C5=C(C)C=C(C)C=C5C)=O	1.32¡À0.10
16m	O=S(N(CC(O)=O)C1=CC=CC2=C1CCN2C(C(NS(C3=C(C)C=CC=C3)(=O)=O)=O)C4=CC(OC)=CC=C4)(C5=C(C)C=C(C)C=C5C)=O	1.79¡À0.11
16n	O=S(N(CC(O)=O)C1=CC=CC2=C1CCN2C(C(NS(C3=C(OC)C=CC=C3)(=O)=O)=O)C4=CC(OC)=CC=C4)(C5=C(C)C=C(C)C=C5C)=O	3.81¡À0.22
16o	O=S(N(CC(O)=O)C1=CC=CC2=C1CCN2C(C(NS(C3=C(OCC)C=CC=C3)(=O)=O)=O)C4=CC(OC)=CC=C4)(C5=C(C)C=C(C)C=C5C)=O	2.56¡À0.16
16p	O=S(N(CC(O)=O)C1=CC=CC2=C1CCN2C(C(NS(C3=C(CC)C=CC=C3)(=O)=O)=O)C4=CC(OC)=CC=C4)(C5=C(C)C=C(C)C=C5C)=O	3.58¡À0.14
16q	O=S(N(CC(O)=O)C1=CC=CC2=C1CCN2C(C(NS(C3=C(F)C=CC=C3)(=O)=O)=O)C4=CC(OC)=CC=C4)(C5=C(C)C=C(C)C=C5C)=O	12.06¡À0.32
16r	O=S(N(CC(O)=O)C1=CC=CC2=C1CCN2C(C(NS(C3=C(Cl)C=CC=C3)(=O)=O)=O)C4=CC(OC)=CC=C4)(C5=C(C)C=C(C)C=C5C)=O	2.76¡À0.13
16s	O=S(N(CC(O)=O)C1=CC=CC2=C1CCN2C(C(NS(C3=C(Br)C=CC=C3)(=O)=O)=O)C4=CC(OC)=CC=C4)(C5=C(C)C=C(C)C=C5C)=O	2.34¡À0.11
16t	O=S(N(CC(O)=O)C1=CC=CC2=C1CCN2C(C(NS(C3=C(C(F)(F)F)C=CC=C3)(=O)=O)=O)C4=CC(OC)=CC=C4)(C5=C(C)C=C(C)C=C5C)=O	16.71¡À0.98
16u	O=S(N(CC(O)=O)C1=CC=CC2=C1CCN2C(C(NS(C3=C(OC(F)(F)F)C=CC=C3)(=O)=O)=O)C4=CC(OC)=CC=C4)(C5=C(C)C=C(C)C=C5C)=O	9.69¡À0.56
16v	O=S(N(CC(O)=O)C1=CC=CC2=C1CCN2C(C(NS(C3=C(C)C=C(C)C=C3)(=O)=O)=O)C4=CC(OC)=CC=C4)(C5=C(C)C=C(C)C=C5C)=O	2.65¡À0.32
16w	O=S(N(CC(O)=O)C1=CC=CC2=C1CCN2C(C(NS(C3=C(OC)C=C(C)C=C3)(=O)=O)=O)C4=CC(OC)=CC=C4)(C5=C(C)C=C(C)C=C5C)=O	0.24¡À0.03
16x	O=S(N(CC(O)=O)C1=CC=CC2=C1CCN2C(C(NS(C3=C(OC)C=C(OC)C=C3)(=O)=O)=O)C4=CC(OC)=CC=C4)(C5=C(C)C=C(C)C=C5C)=O	0.64¡À0.08
16y	O=S(N(CC(O)=O)C1=CC=CC2=C1CCN2C(C(NS(C3=CC(C)=CC(C)=C3)(=O)=O)=O)C4=CC(OC)=CC=C4)(C5=C(C)C=C(C)C=C5C)=O	6.75¡À0.23
16z	O=S(N(CC(O)=O)C1=CC=CC2=C1CCN2C(C(NS(C3=C(C=CC=C4)C4=CC=C3)(=O)=O)=O)C5=CC(OC)=CC=C5)(C6=C(C)C=C(C)C=C6C)=O	1.81¡À0.16
17a	O=S(N(CC(NS(=O)(C1=CC=CC=C1)=O)=O)C2=CC=CC3=C2CCN3C(C(NS(C4=C(OC)C=C(C)C=C4)(=O)=O)=O)C5=CC(OC)=CC=C5)(C6=C(C)C=C(C)C=C6C)=O	0.058 ¡À 0.001
17b	O=S(N(CC(NS(=O)(C1=CC=CC=C1)=O)=O)C2=CC=CC3=C2CCN3C(C(NS(C4=C(OC)C=C(C)C=C4)(=O)=O)=O)C5=CC(OC)=CC=C5)(C6=CC=C(OC)C=C6)=O	0.064 ¡À 0.001
17c	O=S(N(CC(NS(=O)(C1=CC=CC=C1)=O)=O)C2=CC=CC3=C2CCN3C(C(NS(C4=C(OC)C=C(C)C=C4)(=O)=O)=O)C5=CC(OC)=CC=C5)(C6=CC=C(C)C=C6)=O	0.11 ¡À0.01
17d	O=S(N(CC(NS(=O)(C1=CC=CC=C1)=O)=O)C2=CC=CC3=C2CCN3C(C(NS(C4=C(OC)C=C(C)C=C4)(=O)=O)=O)C5=CC(OC)=CC=C5)(C6=CC=C(F)C=C6)=O	0.58 ¡À 0.08
17e	O=S(N(CC(NS(=O)(C1=CC=CC=C1)=O)=O)C2=CC=CC3=C2CCN3C(C(NS(C4=C(OC)C=C(C)C=C4)(=O)=O)=O)C5=CC(OC)=CC=C5)(C6=CC=C(NC(C)=O)C=C6)=O	0.23 ¡À 0.01
17f	O=S(N(CC(NS(=O)(C1=CC=CC=C1)=O)=O)C2=CC=CC3=C2CCN3C(C(NS(C4=C(OC)C=C(C)C=C4)(=O)=O)=O)C5=CC(OC)=CC=C5)(C6=CC=CC=C6OC)=O	0.16 ¡À 0.02
17g	O=S(N(CC(NS(=O)(C1=CC=CC=C1)=O)=O)C2=CC=CC3=C2CCN3C(C(NS(C4=C(OC)C=C(C)C=C4)(=O)=O)=O)C5=CC(OC)=CC=C5)(C6=CC(OC)=CC=C6)=O	0.15 ¡À 0.01
17h	O=S(N(CC(NS(=O)(C1=CC=CC=C1)=O)=O)C2=CC=CC3=C2CCN3C(C(NS(C4=C(OC)C=C(C)C=C4)(=O)=O)=O)C5=CC(OC)=CC=C5)(C6=CC=CC=C6)=O	0.24 ¡À 0.05
18a	O=S(N(CC(NS(C1CC1)(=O)=O)=O)C2=CC=CC3=C2CCN3C(C(NS(C4=C(OC)C=C(C)C=C4)(=O)=O)=O)C5=CC(OC)=CC=C5)(C6=CC=C(OC)C=C6)=O	0.61 ¡À 0.09
18b	O=S(N(CC(NS(C)(=O)=O)=O)C1=CC=CC2=C1CCN2C(C(NS(C3=C(OC)C=C(C)C=C3)(=O)=O)=O)C4=CC(OC)=CC=C4)(C5=CC=C(OC)C=C5)=O	1.74¡À 0.14
18c	O=S(N(CC(NS(=O)(C(F)(F)F)=O)=O)C1=CC=CC2=C1CCN2C(C(NS(C3=C(OC)C=C(C)C=C3)(=O)=O)=O)C4=CC(OC)=CC=C4)(C5=CC=C(OC)C=C5)=O	15.16¡À 2.35
18d	O=S(N(CC(NS(C1=CC=CN=C1)(=O)=O)=O)C2=CC=CC3=C2CCN3C(C(NS(C4=C(OC)C=C(C)C=C4)(=O)=O)=O)C5=CC(OC)=CC=C5)(C6=CC=C(OC)C=C6)=O	0.77 ¡À 0.10
18e	O=S(N(CC(NS(C1=CC=CS1)(=O)=O)=O)C2=CC=CC3=C2CCN3C(C(NS(C4=C(OC)C=C(C)C=C4)(=O)=O)=O)C5=CC(OC)=CC=C5)(C6=CC=C(OC)C=C6)=O	5.16¡À 0.45
19a	O=S(N(CC(NS(=O)(C1=CC=C(OC)C=C1)=O)=O)C2=CC=CC3=C2CCN3C(C(NS(C4=C(OC)C=C(C)C=C4)(=O)=O)=O)C5=CC(OC)=CC=C5)(C6=CC=C(OC)C=C6)=O	0.022 ¡À 0.001
19b	O=S(N(CC(NS(=O)(C1=CC=C(C)C=C1)=O)=O)C2=CC=CC3=C2CCN3C(C(NS(C4=C(OC)C=C(C)C=C4)(=O)=O)=O)C5=CC(OC)=CC=C5)(C6=CC=C(OC)C=C6)=O	0.12 ¡À 0.01
19c	O=S(N(CC(NS(=O)(C1=CC=C(F)C=C1)=O)=O)C2=CC=CC3=C2CCN3C(C(NS(C4=C(OC)C=C(C)C=C4)(=O)=O)=O)C5=CC(OC)=CC=C5)(C6=CC=C(OC)C=C6)=O	0.13 ¡À 0.02
19d	O=S(N(CC(NS(=O)(C1=CC=C(C(F)(F)F)C=C1)=O)=O)C2=CC=CC3=C2CCN3C(C(NS(C4=C(OC)C=C(C)C=C4)(=O)=O)=O)C5=CC(OC)=CC=C5)(C6=CC=C(OC)C=C6)=O	0.40 ¡À 0.06
19e	O=S(N(CC(NS(=O)(C1=CC=C(CC)C=C1)=O)=O)C2=CC=CC3=C2CCN3C(C(NS(C4=C(OC)C=C(C)C=C4)(=O)=O)=O)C5=CC(OC)=CC=C5)(C6=CC=C(OC)C=C6)=O	0.19 ¡À 0.01
19f	O=S(N(CC(NS(=O)(C1=CC=C(O)C=C1)=O)=O)C2=CC=CC3=C2CCN3C(C(NS(C4=C(OC)C=C(C)C=C4)(=O)=O)=O)C5=CC(OC)=CC=C5)(C6=CC=C(OC)C=C6)=O	0.51 ¡À 0.03
19g	O=S(N(CC(NS(=O)(C1=CC=C(OCC)C=C1)=O)=O)C2=CC=CC3=C2CCN3C(C(NS(C4=C(OC)C=C(C)C=C4)(=O)=O)=O)C5=CC(OC)=CC=C5)(C6=CC=C(OC)C=C6)=O	0.048 ¡À 0.001
19h	O=S(N(CC(NS(=O)(C1=C(OC)C=CC=C1)=O)=O)C2=CC=CC3=C2CCN3C(C(NS(C4=C(OC)C=C(C)C=C4)(=O)=O)=O)C5=CC(OC)=CC=C5)(C6=CC=C(OC)C=C6)=O	> 100
19i	O=S(N(CC(NS(=O)(C1=CC(OC)=CC=C1)=O)=O)C2=CC=CC3=C2CCN3C(C(NS(C4=C(OC)C=C(C)C=C4)(=O)=O)=O)C5=CC(OC)=CC=C5)(C6=CC=C(OC)C=C6)=O	> 100
